# Supplementary material for: Assessing Matched Normal and Tumor Pairs in Next-Generation Sequencing Studies
Source: PLoS One. 2011 Mar 18;6(3):e17810. doi: 10.1371/journal.pone.0017810 (PMC3060821; doi:10.1371/journal.pone.0017810)
Supplement: Table S1 — IBS scores and tumor content for the 22 samples in SNP6 data. *Sample 76629543 was sequenced (NGS) and profiled for SNP6. (XLSX) [file pone.0017810.s005.xlsx]

## Sheet: Sheet1
Table S1 IBS scores and tumor content for the 22 samples in SNP6 data. *Sample 76629543 was sequenced (NGS) and profiled for SNP6.
Sample	Number of SNPs	IBSmean	IBSvar	IBSmv	Tumor content (%)
				(IBSmean/IBSvar)
980156	27969	1.91	0.08	22.79	80
76629543*	28356	1.93	0.07	28.59	80
57689477	27783	1.96	0.04	53.91	70
980021	28240	1.98	0.02	81.82	50
970005	28614	1.98	0.02	115.46	60
980029	28246	1.98	0.02	115.83	70
66811693	29010	1.99	0.01	319.79	0
38877042	29074	1.99	0.01	359.93	90
87622942	29023	1.99	0.01	361.53	75
65256293	29164	2	0	433.05	50
980251	28740	2	0	446.57	0
980035	29259	2	0	523.47	20
73291145	29088	2	0	588.62	15
58947266	28875	2	0	590.27	20
96141474	29349	2	0	632.14	20
20263644	29084	2	0	831.95	10
61669256	29156	2	0	846.07	30
47492137	29288	2	0	1028.62	0
46404174	29189	2	0	2013.97	40
32226415	29485	2	0	2034.38	0
980011	29207	2	0	2164.41	30
970017	29430	2	0	3679.62	20
